# Supplementary material
Source: MDPI journal article supplement (https://www.mdpi.com/2076-3263/14/2/50)
Supplement: s1 [file s1]

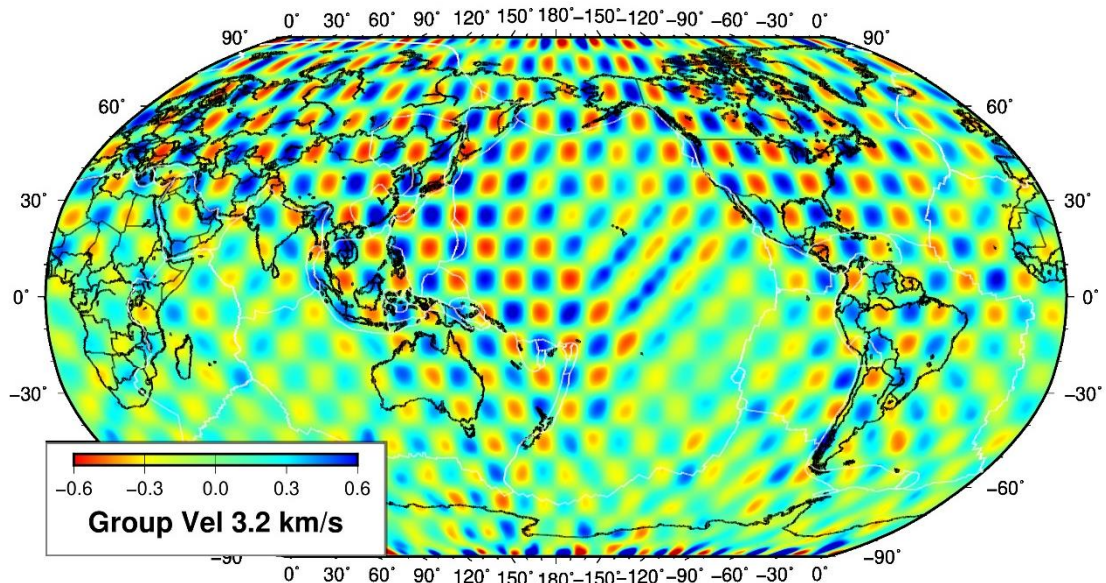

Figure S1: Checkerboard pattern for velocity tomography. This includes 65 seconds of Gaussian noise. Square sizes were 10 degrees. Input values were 2.8 and 3.9 km/s

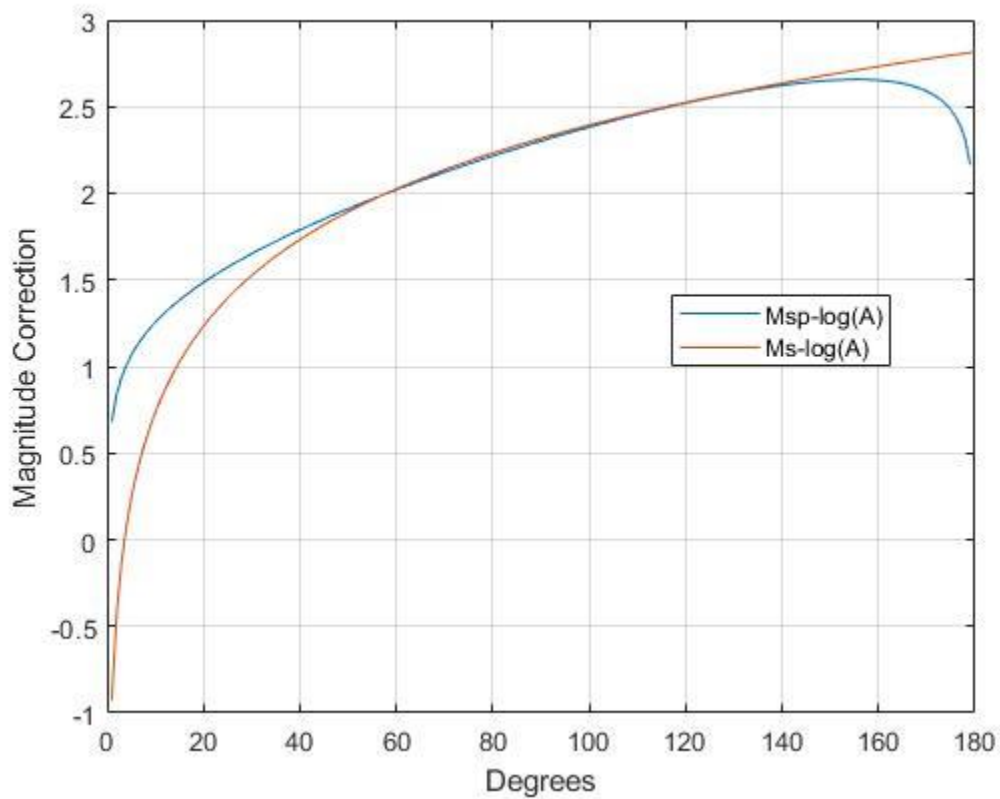

Figure S2: Magnitude corrections. These use the  $M_{sp}$  and  $M_s$  scales of Equations 8 and 9. Note the agreement in the 20 to 160 km range where  $M_s$  is defined.

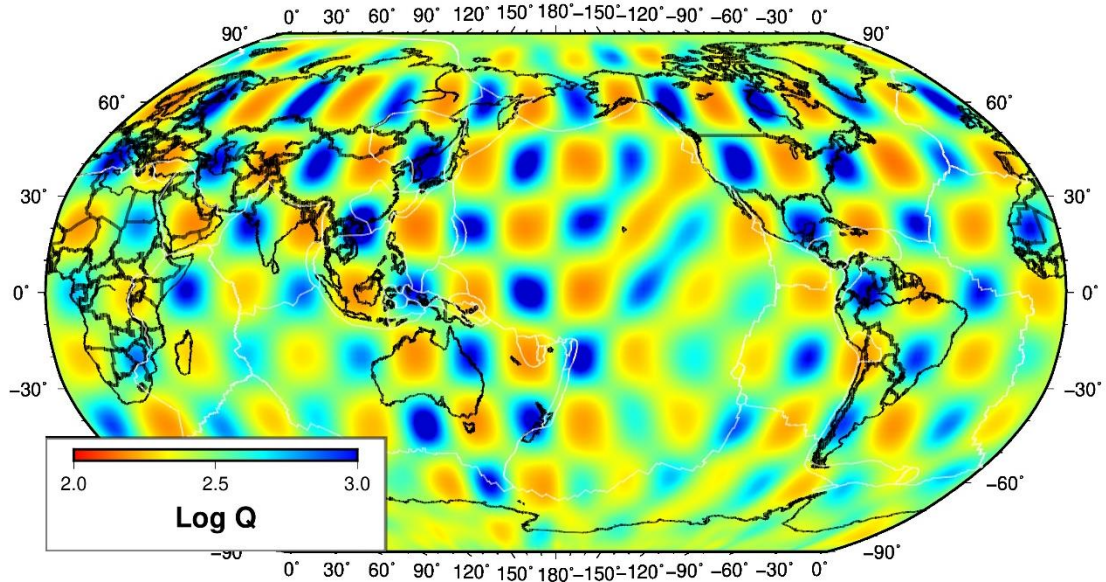

Figure S3: Checkerboard pattern for attenuation tomography. This includes 0.23 magnitude units of Gaussian noise. Square sizes were 15 degrees. Input values were 171 and 897.
